1 **Title:**

2 **A conformational change in the N terminus of SLC38A9 signals**  
3 **mTORC1 activation**

4  
5 **Short titles:**

6 Ball-and-chain model of SLC38A9 N-terminus

7  
8 **One Sentence Summary:**

9 N-plug inserted state of SLC38A9 reveals mechanisms of mTORC1 activation and  
10 arginine-enhanced luminal amino acids efflux.

11

12 **Authors:**

13 Jinming Ma<sup>1†</sup>, Hsiang-Ting Lei<sup>2†</sup> and Tamir Gonen<sup>1,2,3§</sup>

14

15 **Affiliations:**

16 <sup>1</sup> Howard Hughes Medical Institute, University of California, Los Angeles, Los  
17 Angeles CA 90095 USA.

18 <sup>2</sup> Janelia Research Campus, Howard Hughes Medical Institute, 19700 Helix Drive  
19 Ashburn VA USA.

20 <sup>3</sup> Departments of Physiology and Biological Chemistry, David Geffen School of  
21 Medicine, University of California, Los Angeles, Los Angeles CA 90095 USA.

22 <sup>†</sup> These authors contributed equally to this work.

23 <sup>§</sup> Corresponding author. E-mail: [tgonen@ucla.edu](mailto:tgonen@ucla.edu)

24

25 **Abstract:**

26 mTORC1 is a central signal hub that integrates multiple environmental cues, such as  
27 cellular stresses, energy levels, nutrients and certain amino acids, to modulate  
28 metabolic status and cellular responses. Recently, SLC38A9, a lysosomal amino acid  
29 transporter, has emerged as a sensor for luminal arginine levels and as an activator of  
30 mTORC1. The activation of mTORC1 occurs through the N-terminal domain of  
31 SLC38A9. Here, we determined the crystal structure of SLC38A9 and surprisingly  
32 found its N-terminal fragment inserted deep into the transporter, bound in the  
33 substrate binding pocket where normally arginine would bind. Compared with our  
34 recent arginine bound structure of SLC38A9, a significant conformational change of  
35 the N-terminal domain was observed. A ball-and-chain model is proposed for  
36 mTORC1 activation where in the starved state the N-terminal domain of SLC38A9 is

37 buried deep in the transporter but in the fed state the N-terminal domain could be  
38 released becoming free to bind the Rag GTPase complex and to activate mTORC1.  
39 This work provides important new insights into how SLC38A9 senses the fed state  
40 and activates the mTORC1 pathways in response to dietary amino acids.

41

42 **Main Text:**

43 The mechanistic target of rapamycin complex 1 (mTORC1) protein kinase acts as a  
44 central signaling hub to control cell growth and balance the products from anabolism  
45 and catabolism (1–3). Not surprisingly this pathway is dysregulated in many diseases  
46 (4, 5). Activation of the mTORC1 is mediated by a variety of environmental cues  
47 such as nutrients, cellular stresses and energy levels (6, 7). Specifically, certain amino  
48 acids signal to mTORC1 through two Ras-related guanosine triphosphatases  
49 (GTPases) (8, 9). When amino acids are abundant, the heterodimeric Rag GTPases  
50 adopt an active state and promote the recruitment of mTORC1 to the lysosomal  
51 surface (10), which is now recognized as a key subcellular organelle involved in  
52 mTORC1 regulation (11). Several essential amino acids in the lysosomal lumen  
53 including arginine, leucine and glutamine have been identified as effective activators  
54 of mTORC1 (12–15). However, the molecular basis of the amino acids sensing  
55 mechanism has remained, by and large, elusive. Recently, SLC38A9, a low-affinity  
56 arginine transporter on lysosome vesicles, was identified as a direct sensor of lumen  
57 arginine levels for the mTORC1 pathway (16–18). SLC38A9 also mediates the efflux  
58 of essential amino acids from lysosomes, such as leucine, in an arginine regulated  
59 manner (19), to drive cell growth by modulating cytosolic sensors (20, 21). Moreover,  
60 SLC38A9 senses the presence of luminal cholesterol and activates mTORC1  
61 independently of its arginine transport (22).

62

63 SLC38A9 is a transceptor. Studies showed that two parts of SLC38A9, its N-terminal  
64 domain and its transmembrane bundle, are responsible for two distinct functions. The  
65 bulk of SLC38A9 are 11 alpha helices that pack against one another forming a  
66 transmembrane bundle that transports amino acids and function as an amino acid  
67 transporter (23). The N-terminus of SLC38A9, on the other hand, was previously  
68 shown to interact directly with the Rag-Regulator complex to activate mTORC1 (16).  
69 Collectively, these results suggest that SLC38A9 is a “transceptor”, which is  
70 membrane protein that embodies the functions of both a transporter and a receptor  
71 (23–27).

72

73 Recently we solved the crystal structure of N-terminally truncated SLC38A9 from  
74 *Danio rerio* ( $\Delta$ N-drSLC38A9) with arginine bound (23). The substrate arginine was  
75 observed deep in the transporter at a binding pocket consisting of residues from  
76 TM1a, TM3 and TM8 of SLC38A9. Because the N-terminally truncated form of  
77 SLC38A9 was used that initial study focused solely on the transporter function of  
78 SLC38A9 and resulting structures could not inform on the signaling function of  
79 SLC38A9.

80

81 Here we report a new crystal structure of drSLC38A9 with its N-terminus but without  
82 the substrate arginine. Surprisingly, we found that part of the N-terminus formed a  
83 beta hairpin that lodged itself deep in the transporter occupying the arginine binding  
84 site and blocking the transport path. These new results suggest that in the fed state the  
85 N-terminal domain would be released from within SLC38A9 and freed to interact  
86 with the Rag GTPase and activate mTORC1. We propose a ball-and-chain model to  
87 describe this mechanism of amino acid sensation and signaling by SLC38A9.

88

89 In the present study we used the antibody fragment 11D3 to facilitate crystallization  
90 of SLC38A9 in the absence of substrate. Well-ordered crystals were diffracted to  $\sim 3.4$   
91 Å with high completeness and acceptable refinement statistics (Table. S1). Each  
92 asymmetric unit contained two copies of drSLC38A9-Fab complex, arranged in a  
93 propeller-like head-to-head fashion (fig. S1). As with the recently determined  
94 structure(23), the transmembrane domain of drSLC38A9 was captured in the cytosol-  
95 open state and was folded into the same inverted topology repeats made of TMs 1-5  
96 and TMs 6-10 with TM11 wrapping around the transceptor (Fig. 1A and 1B). The two  
97 structures shared an overall similar fold with an r.m.s.d. of 0.8 Å. However, instead of  
98 an arginine molecule bound, this time an unexpected electron density was observed,  
99 which extended along the solvent accessible tunnel leading from the substrate binding  
100 site to the cytosolic side of SLC38A9 (fig. S2). The density was of sufficient quality  
101 to allow an unambiguous assignment of drSLC38A9 N-terminal section from Asp 75  
102 to Leu 91 (fig. S3). This fragment formed a folded domain, resembling a beta hairpin,  
103 filling the entire path from the cytosolic side of SLC38A9 to the substrate binding site  
104 (Fig. 1C). Electrostatic potential analysis indicated that the transport pathway in  
105 SLC38A9 is generally positively charged, while the N-terminal fragment (referred to  
106 as the “N-plug” from this point on) is largely negatively charged (fig. S4), suggesting  
107 that the interaction is electrostatically driven. Deletion of the N-terminal domain of  
108 drSLC38A9 did not affect arginine transport (Fig. 1D), indicating that the N-plug  
109 does not directly participate in arginine translocation.

110

111 We captured SLC38A9 in a new state that we term the “N-plug inserted state”. TMs  
112 1, 5, 6 and 8 of SLC38A9 form a V-shaped cavity into which the N-plug inserts and is  
113 stabilized by several bonds (Fig. 2). At the tapered tip on the N-plug, Ser 80 and His  
114 81 bound to the main-chain carbonyl oxygens of Thr 117, Met 118 and Met 119 in the  
115 unwound region of TM1 (Fig. 2A). His 81 further stabilizes the tip region of the N-  
116 plug through a hydrogen bond between its imidazole side chain and Thr 121 (Fig.  
117 2A). Likewise, the main-chain carbonyl oxygen of Ile 84 is bound to Cys 363 on TM6  
118 (Fig. 2B). At this juncture, the N-plug is jammed in between the two essential TMs 1  
119 and 6 where it would probably prevent the transmembrane domain from transitioning  
120 to an alternate state for transport. At the N-terminus of the N-plug, the flanking  
121 residues are anchored against TM5 through a hydrogen bond formed between the  
122 main-chain carbonyl oxygens of Val 77 and the side-chain hydroxyl group of Thr 303  
123 (Fig. 2C). At the C-terminus of the N-plug, the Tyr-Ser pairs involving Tyr 87, Tyr  
124 448 and Ser 88, Ser 297 also stabilize the interaction by hydrogen bonds (Fig. 2D).  
125 All residues that participate in the inter-domain interactions are conserved across  
126 species as indicated in the sequence alignments (fig. S3), suggesting that this  
127 interaction is evolutionarily conserved and likely plays an important functional role.  
128 The beta-hairpin structure of the N-plug is also self-stabilized by several hydrogen  
129 bonds between Ser 80 and Glu 82, His76 and Tyr 85 which fasten the two ends of the  
130 N-plug together (Fig. 2E). Structural modeling by PEP-FOLD (28, 29) indicated that  
131 the beta hairpin motif would be converted to an alpha helical fragment should these  
132 residues were changed to alanines (fig. S5).

133

134 SLC38A9 has higher affinity toward leucine than arginine although the transport of  
135 leucine is largely facilitated by the presence of arginine (19). Uptake studies  
136 performed here with drSLC38A9 corroborate the previous findings using the human  
137 protein (Fig. 3B). Leucine uptake was significantly higher in the presence of  
138 supplemented arginine than without. An overlay of the N-plug bound structure and  
139 the arginine bound structure indicated that the same set of backbone atoms are used  
140 for binding the N-plug and the arginine molecule (Fig. 3A). This superposition  
141 suggests that in the presence of arginine the N-terminal plug may not occupy the  
142 binding site, but that in the absence of arginine it would be free to insert and bind. Is it  
143 possible, therefore, that in the presence of arginine the released N-terminal plug could  
144 play an important role in facilitating leucine transport?

145

146 To examine whether the N-terminal plug plays an important role in facilitating leucine  
147 transport, two drSLC38A9 variants were generated. One has residues 1-96 of N-  
148 terminus deleted (called N-truncated). The other has 5 key residues mutated (P79A,  
149 S80A, H81A, E82A, and Y85A) in the N-plug (named 5A mutant) which would lead  
150 to a disrupted secondary structure of the N-plug (fig. S5). As observed in the uptake  
151 study, both variants could transport arginine like the wild-type drSLC38A9 even with  
152 the dramatic structural changes at the N-plug (Fig. 1 D). From the results of leucine  
153 uptake by wild-type drSLC38A9, the arginine-enhanced transport of leucine is  
154 reflected as increased uptake of [<sup>3</sup>H]-leucine when the buffer was supplemented with  
155 arginine. This characteristic of arginine-enhanced leucine transport was lost when the  
156 N-plug was eliminated or its structure altered by mutation (Fig. 3C and 3D). Only the  
157 SLC38A9 with intact N-terminal plug in its native beta hairpin like structure showed  
158 the characteristic enhanced leucine uptake in the presence of supplemented arginine  
159 (Fig. 3B).

160

161 It is known that the N-terminal domain of SLC38A9 can bind to, and activate, the Rag  
162 GTPases complex (16). Moreover, it was shown that the N-terminal fragment of  
163 human SLC38A9 (hSLC38A9) was sufficient and required to bind the Regulator-Rag  
164 GTPases complex (16). The binding of Rag GTPases and the human SLC38A9  
165 involves the 85PDH87 motif (17), Pro 85 and Pro 90 (16), corresponding to a  
166 conserved region on the N-plug in drSLC38A9 (fig. S3). To probe the N-plug  
167 interaction with the Rag GTPases in drSLC38A9, we co-purified zebrafish Rag  
168 GTPases complex (drRagA and drRagC) with two N-terminal fragments of  
169 drSLC38A9 by size-exclusion chromatography. The first fragment (residues 1-96)  
170 contained the N terminus in its entirety (called drSLC38A9-N.1) while in the second  
171 fragment (residues 1-70) the N-plug was deleted (called drSLC38A9-N.2). Fractions  
172 from size exclusion chromatography were collected and analyzed by SDS-PAGE (fig.  
173 S6). Contrary to fragment drSLC38A9-N.1 which maintains the N-terminal domain in  
174 its entirety, the N-plug deleted construct, drSLC38A9-N.2 did not associate with Rag  
175 GTPases complex (fig. S6). These results clearly demonstrated that the interaction  
176 between the zebrafish SLC38A9 N-terminus and the zebrafish Rag-GTPase  
177 recapitulate the experiments reported previously using the human proteins (17, 16):  
178 the same region of the N-plug of drSLC38A9 is essential for binding with Rag  
179 GTPases complex.

180

181 In considering our recently determined structure of SLC38A9 with arginine  
182 bound, and the current structure without arginine but with the N-plug inserted into the

183 arginine binding site, we now captured SLC38A9 is at least two distinct  
184 conformations of the N-terminus. The first is when the N-plug is bound snugly in the  
185 arginine binding site (in the absence of arginine, starved state) and the second where  
186 the N-terminal plug was released and the substrate binding site was occupied by  
187 arginine (in the presence of arginine, fed state). The vestibule into which the N-  
188 terminal plug inserts measures  $\sim 20\text{\AA}$  in diameter. A recently determined crystal  
189 structure of Rag GTPases-Ragulator (30–32) indicated that the GTPases-regulator is  
190 far too large to fit inside the vestibule of SLC38A9 suggesting that the N-plug must  
191 exit the transceptor for binding the Rag GTPase. Together, these data suggest a  
192 mechanism by which SLC38A9 can act as a receptor to signal the activation of Rag  
193 GTPase and therefore of mTORC1 in the presence of arginine.

194

195 We thus propose a ball-and-chain model (Fig. 4). At lower arginine concentrations,  
196 two conformational states could be at an equilibrium where the N-terminal plug is  
197 equally inserted or released from the arginine binding site of SLC38A9. When the  
198 equilibrium shifts to the right in the fed state with elevated arginine levels, an arginine  
199 molecule will occupy the binding site of SLC38A9 for transport and the N-terminal  
200 plug would remain released as long as arginine flows. As a result, the N-terminal plug  
201 becomes available for binding to the Rag GTPases complex which in turn could  
202 activate the mTORC1. Moreover, the release of the N-terminal plug from the helical  
203 bundle of SLC38A9 will also facilitate the efflux of other essential amino acids,  
204 which simultaneously increases the cytosolic concentration of amino acids and  
205 synergistically activates mTORC1 through other cytosolic sensors.

206 While the present study provides the first line of evidence on the function of  
207 SLC38A9 as a transporter and sensor for amino acids it remains unclear how the N-  
208 terminal domain associates with the Rag GTPase complex. Likewise, it is still not  
209 known what the open-to-lumen conformation of the transporter looks like and  
210 whether the N-plug remains inserted or not. Future studies must delve into these  
211 important open questions but with the newly proposed ball-and-chain model for  
212 signaling new biochemical assays can be designed and tested.

213

#### 214 **References and Notes:**

- 215 1. R. A. Saxton, D. M. Sabatini, mTOR Signaling in Growth, Metabolism, and  
216 Disease. *Cell*. **168**, 960–976 (2017).
- 217 2. I. Ben-Sahra, B. D. Manning, mTORC1 signaling and the metabolic control of  
218 cell growth. *Curr. Opin. Cell Biol.* **45**, 72–82 (2017).
- 219 3. M. Shimobayashi, M. N. Hall, Making new contacts: The mTOR network in  
220 metabolism and signalling crosstalk. *Nat. Rev. Mol. Cell Biol.* (2014),



- 221 doi:10.1038/nrm3757.
- 222 4. M. Laplante, D. M. Sabatini, mTOR signaling in growth control and disease.  
223 *Cell*. **149**, 274–93 (2012).
- 224 5. R. Zoncu, A. Efeyan, D. M. Sabatini, mTOR: from growth signal integration to  
225 cancer, diabetes and ageing. *Nat. Rev. Mol. Cell Biol.* **12**, 21–35 (2011).
- 226 6. C. C. Dibble, B. D. Manning, Signal integration by mTORC1 coordinates  
227 nutrient input with biosynthetic output. *Nat. Cell Biol.* **15**, 555–564 (2013).
- 228 7. S. Sengupta, T. R. Peterson, D. M. Sabatini, Regulation of the mTOR Complex  
229 1 Pathway by Nutrients, Growth Factors, and Stress. *Mol. Cell*. **40**, 310–322  
230 (2010).
- 231 8. Y. Sancak *et al.*, The Rag GTPases bind raptor and mediate amino acid  
232 signaling to mTORC1. *Science*. **320**, 1496–501 (2008).
- 233 9. E. Kim, P. Goraksha-Hicks, L. Li, T. P. Neufeld, K.-L. Guan, Regulation of  
234 TORC1 by Rag GTPases in nutrient response. *Nat. Cell Biol.* **10**, 935–945  
235 (2008).
- 236 10. Y. Sancak *et al.*, Ragulator-Rag complex targets mTORC1 to the lysosomal  
237 surface and is necessary for its activation by amino acids. *Cell*. **141**, 290–303  
238 (2010).
- 239 11. R. Zoncu *et al.*, mTORC1 senses lysosomal amino acids through an inside-out  
240 mechanism that requires the vacuolar H<sup>+</sup>-ATPase. *Science (80-. )*. **334**, 678–  
241 683 (2011).
- 242 12. R. L. Wolfson, D. M. Sabatini, The Dawn of the Age of Amino Acid Sensors  
243 for the mTORC1 Pathway. *Cell Metab.* **26**, 301–309 (2017).
- 244 13. M. Shimobayashi, M. N. Hall, Multiple amino acid sensing inputs to mTORC1.  
245 *Cell Res.* **26**, 7–20 (2016).
- 246 14. D. C. I. Goberdhan, C. Wilson, A. L. Harris, Amino Acid Sensing by  
247 mTORC1: Intracellular Transporters Mark the Spot. *Cell Metab.* **23**, 580–589  
248 (2016).
- 249 15. J. L. Jewell, R. C. Russell, K.-L. Guan, Amino acid signalling upstream of  
250 mTOR. *Nat. Rev. Mol. Cell Biol.* **14**, 133–139 (2013).
- 251 16. S. Wang *et al.*, Lysosomal amino acid transporter SLC38A9 signals arginine  
252 sufficiency to mTORC1. *Science (80-. )*. **347**, 188–194 (2015).
- 253 17. M. Rebsamen *et al.*, SLC38A9 is a component of the lysosomal amino acid  
254 sensing machinery that controls mTORC1. *Nature*. **519**, 477–481 (2015).
- 255 18. J. Jung, H. M. Genau, C. Behrends, Amino Acid-Dependent mTORC1  
256 Regulation by the Lysosomal Membrane Protein SLC38A9. *Mol. Cell. Biol.*  
257 **35**, 2479–2494 (2015).
- 258 19. G. A. Wyant *et al.*, mTORC1 Activator SLC38A9 Is Required to Efflux  
259 Essential Amino Acids from Lysosomes and Use Protein as a Nutrient. *Cell*.  
260 **171**, 642–654.e12 (2017).
- 261 20. R. L. Wolfson *et al.*, Sestrin2 is a leucine sensor for the mTORC1 pathway.  
262 *Science*. **351**, 43–8 (2016).

- 263 21. R. A. Saxton *et al.*, Structural basis for leucine sensing by the Sestrin2-  
264 mTORC1 pathway. *Science*. **351**, 53–8 (2016).
- 265 22. B. M. Castellano *et al.*, Lysosomal cholesterol activates mTORC1 via an  
266 SLC38A9-Niemann-Pick C1 signaling complex. *Science (80-. )*. **355**, 1306–  
267 1311 (2017).
- 268 23. H.-T. Lei, J. Ma, S. Sanchez-Martinez, T. Gonen, Crystal structure of arginine-  
269 bound lysosomal transporter SLC38A9 in the cytosol-open state. *bioRxiv*,  
270 288233 (2018).
- 271 24. G. Van Zeebroeck, B. M. Bonini, M. Versele, J. M. Thevelein, Transport and  
272 signaling via the amino acid binding site of the yeast Gap1 amino acid  
273 transceptor. *Nat. Chem. Biol.* **5**, 45–52 (2009).
- 274 25. H. S. Hundal, P. M. Taylor, Amino acid transceptors: gate keepers of nutrient  
275 exchange and regulators of nutrient signaling. *Am. J. Physiol. Metab.* **296**,  
276 E603–E613 (2009).
- 277 26. Y. Popova, P. Thayumanavan, E. Lonati, M. Agrochão, J. M. Thevelein,  
278 Transport and signaling through the phosphate-binding site of the yeast Pho84  
279 phosphate transceptor. *Proc. Natl. Acad. Sci. U. S. A.* **107**, 2890–5 (2010).
- 280 27. B. van den Berg *et al.*, Structural basis for Mep2 ammonium transceptor  
281 activation by phosphorylation. *Nat. Commun.* **7**, 11337 (2016).
- 282 28. Y. Shen, J. Maupetit, P. Derreumaux, P. Tufféry, Improved PEP-FOLD  
283 Approach for Peptide and Miniprotein Structure Prediction. *J. Chem. Theory*  
284 *Comput.* **10**, 4745–4758 (2014).
- 285 29. P. Thevenet *et al.*, PEP-FOLD: an updated de novo structure prediction server  
286 for both linear and disulfide bonded cyclic peptides. *Nucleic Acids Res.* **40**,  
287 W288–W293 (2012).
- 288 30. M. E. G. De Araujo *et al.*, Crystal structure of the human lysosomal mTORC1  
289 scaffold complex and its impact on signaling. *Science (80-. )*. **358**, 377–381  
290 (2017).
- 291 31. M.-Y. Su *et al.*, Hybrid Structure of the RagA/C-Ragulator mTORC1  
292 Activation Complex. *Mol. Cell.* **68**, 835–846.e3 (2017).
- 293 32. R. Yonehara *et al.*, Structural basis for the assembly of the Ragulator-Rag  
294 GTPase complex. *Nat. Commun.* **8**, 1625 (2017).
- 295 33. E. Harlow, D. Lane, *Antibodies: A Laboratory Manual* (Cold Spring Harbor  
296 Laboratory Press, 1988).
- 297 34. H. H. Lim, Y. Fang, C. Williams, High-efficiency screening of monoclonal  
298 antibodies for membrane protein crystallography. *PLoS One*. **6**, 1–6 (2011).
- 299 35. M. D. Winn *et al.*, Overview of the CCP 4 suite and current developments.  
300 *Acta Crystallogr. Sect. D Biol. Crystallogr.* **67**, 235–242 (2011).
- 301 36. A. J. McCoy *et al.*, Phaser crystallographic software. *J Appl Crystallogr.* **40**,  
302 658–674 (2007).
- 303 37. P. Emsley, B. Lohkamp, W. G. Scott, K. Cowtan, Features and development of  
304 Coot. *Acta Crystallogr D Biol Crystallogr.* **66**, 486–501 (2010).



- 305 38. P. H. Zwart *et al.*, Automated structure solution with the PHENIX suite.  
306 *Methods Mol Biol.* **426**, 419–435 (2008).
- 307 39. P. D. Adams *et al.*, PHENIX: A comprehensive Python-based system for  
308 macromolecular structure solution. *Acta Crystallogr. Sect. D Biol. Crystallogr.*  
309 **66**, 213–221 (2010).
- 310 40. V. B. Chen *et al.*, MolProbity: all-atom structure validation for macromolecular  
311 crystallography. *Acta Crystallogr D Biol Crystallogr.* **66**, 12–21 (2010).
- 312 41. Y. Cheng, D. J. Patel, An efficient system for small protein expression and  
313 refolding. *Biochem. Biophys. Res. Commun.* **317**, 401–405 (2004).
- 314 42. Schrodinger LLC, The PyMOL Molecular Graphics System, Version 1.8  
315 (2015).
- 316 43. F. Sievers *et al.*, Fast, scalable generation of high-quality protein multiple  
317 sequence alignments using Clustal Omega. *Mol. Syst. Biol.* **7**, 539 (2011).
- 318 44. X. Robert, P. Gouet, Deciphering key features in protein structures with the  
319 new ENDscript server. *Nucleic Acids Res.* **42**, W320–W324 (2014).
- 320 45. M. S. Weiss, IUCr, Global indicators of X-ray data quality. *J. Appl.*  
321 *Crystallogr.* **34**, 130–135 (2001).
- 322

### 323 **Acknowledgements:**

324 We thank D. Cawley for development and production of monoclonal antibodies; K.  
325 Rajashankar and the staffs in Northeastern Collaborative Access Team (NE-CAT) for  
326 their support with X-ray data collection; J. Hattne for discussions over structural  
327 determination; L. Shao for careful review and scientific feedback on the manuscript.  
328 This work is based upon research conducted at the NE-CAT beamlines, which are  
329 funded by the National Institute of General Medical Sciences from the National  
330 Institutes of Health (P41 GM103403). The Pilatus 6M detector on 24-ID-C beam line  
331 is funded by a NIH-ORIP HEI grant (S10 RR029205). This research used resources of  
332 the Advanced Photon Source, a U.S. Department of Energy (DOE) Office of Science  
333 User Facility operated for the DOE Office of Science by Argonne National  
334 Laboratory under Contract No. DE-AC02-06CH11357. Research in the Gonen  
335 laboratory is funded by the Howard Hughes Medical Institute. The coordinates and  
336 the structure factors have been deposited in the Protein Data Bank (PDB) under  
337 accession codes 6DCI.

338

### 339 **Supplementary Materials**

340 Materials and Methods

341 Table S1

342 Fig S1 – S6

343 References (33 – 45)

344

### 345 **Figure legends:**

346 **Fig. 1. Structure of drSLC38A9 in the N-plug inserted state.** (A) Stereo view in  
347 the plane of the membrane. TMs are rainbow colored as blue to red from N- to C-  
348 terminus. The N-plug is shown in magenta. (B) Two-dimensional topology model of  
349 drSLC38A9, which is folded into a characteristic 2-fold LeuT-like pseudo-symmetry  
350 (five transmembrane-helix inverted-topology repeat). N-plug is marked by a filled  
351 pink triangle, next to the TM1a helix. (C) The N-plug blocks an otherwise cytosol-  
352 open state of drSLC38A9. (D) Truncation or mutation of the N-plug does not affect  
353 arginine transport. Shown here is the time course of [<sup>3</sup>H]-arginine uptake in  
354 proteoliposomes reconstituted with purified wild-type drSLC38A9 and its mutants.  
355 Error bars represent standard error of the mean (s.e.m.) of triplicate experiments.  
356

357 **Fig. 2. Inter- and intra-domain interactions of the N-plug inside SLC38A9.** (A to  
358 D) The N-plug interacts with transmembrane bundle through multiple inter-domain  
359 hydrogen bonds. Residues that contribute interactions between the N-plug and TMs  
360 are highlighted in sticks, of which hydrogen bonds are depicted as dashed lines. (E)  
361 The folded conformation of N-plug as a beta hairpin is complementarily stabilized by  
362 several intra-domain interactions.  
363

364 **Fig. 3. The N-plug is essential for arginine enhanced transport of leucine by**  
365 **drSLC38A9.** (A) Superposition of substrate binding site of arginine-bound state  
366 (PDB ID: 6C08) with N-plug inserted state of drSLC38A9. TM1 of two different  
367 states are shown in gold and blue, respectively. Atoms of arginine molecule are  
368 depicted as spheres while the N-plug in magenta. (B) Adding 200 $\mu$ m unlabeled  
369 arginine boosts leucine transport by wild-type drSLC38A9 in proteoliposomes. (C  
370 and D) Either deletion or mutation of N-plug interferes the arginine enhancement of  
371 leucine transport. Without adding supplemented arginine, the mutant proteins show  
372 similar transport capacity for leucine regardless whether arginine was supplemented.  
373

374 **Fig. 4. Ball and chain model of SLC38A9 for mTORC1 activation and amino**  
375 **acid transport.** At low luminal arginine, N-plug domain naturally samples both the  
376 inserted and released state as an equilibrium. As the concentration of luminal arginine  
377 increase in the fed state, arginine molecules enter the substrate binding site and the N-  
378 plug remains in the released state while arginine transport takes place. In the released  
379 state the N-plug could both trigger the efflux of other luminal amino acids such as  
380 leucine and interact with the Rag-GTPases to activate the mTORC1 signaling  
381 pathway.  
382  
383  
384  
385  
386  
387

388 **Figures:**

**Fig. 1**

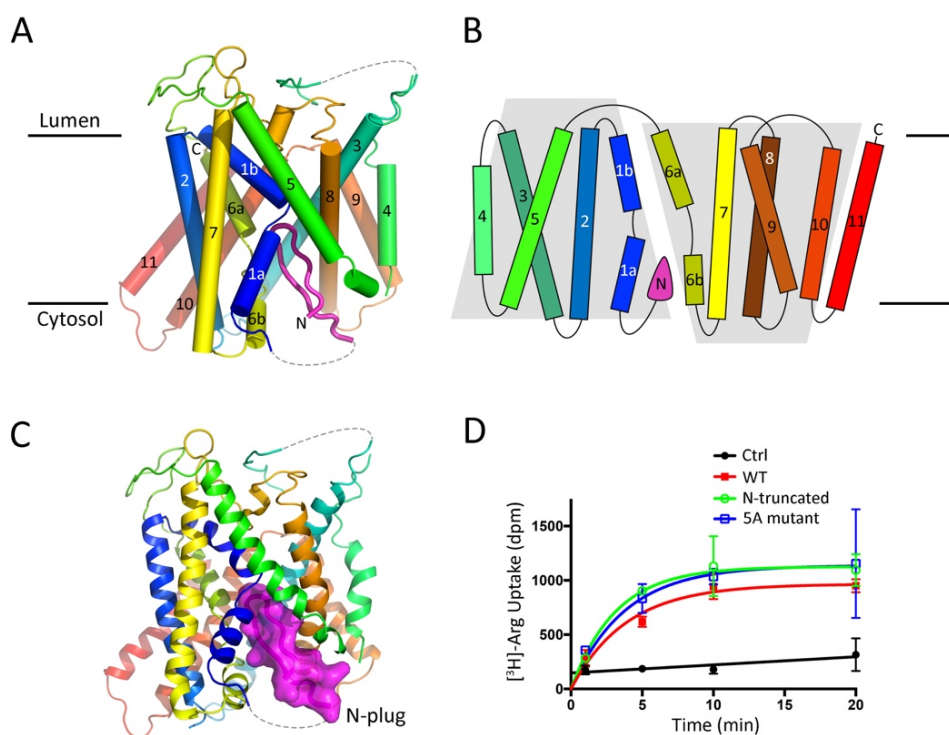

389

**Fig. 2**

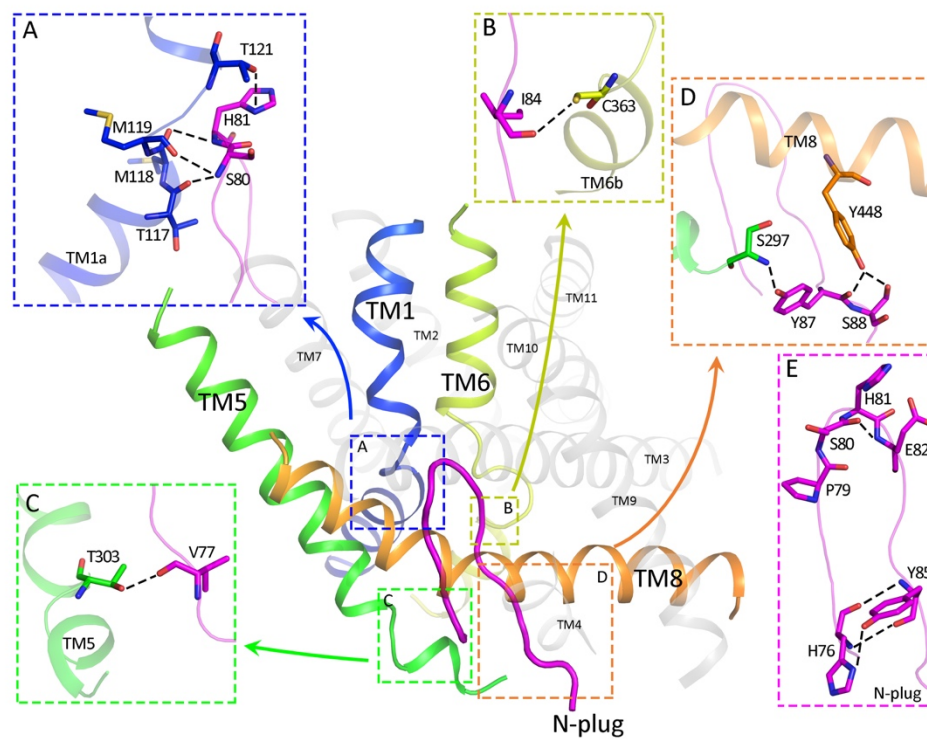

390

Fig. 3

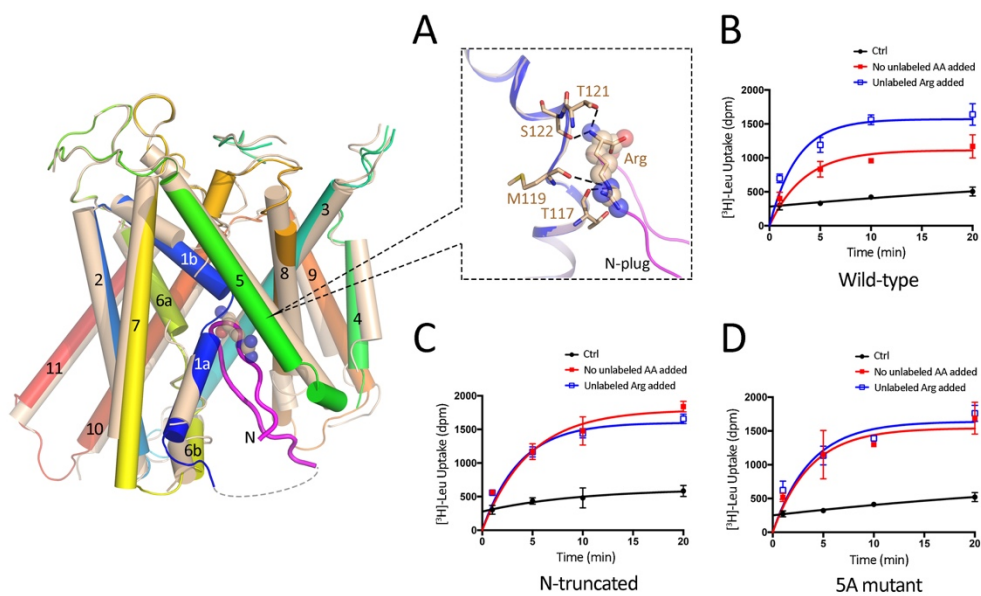

391

Fig. 4

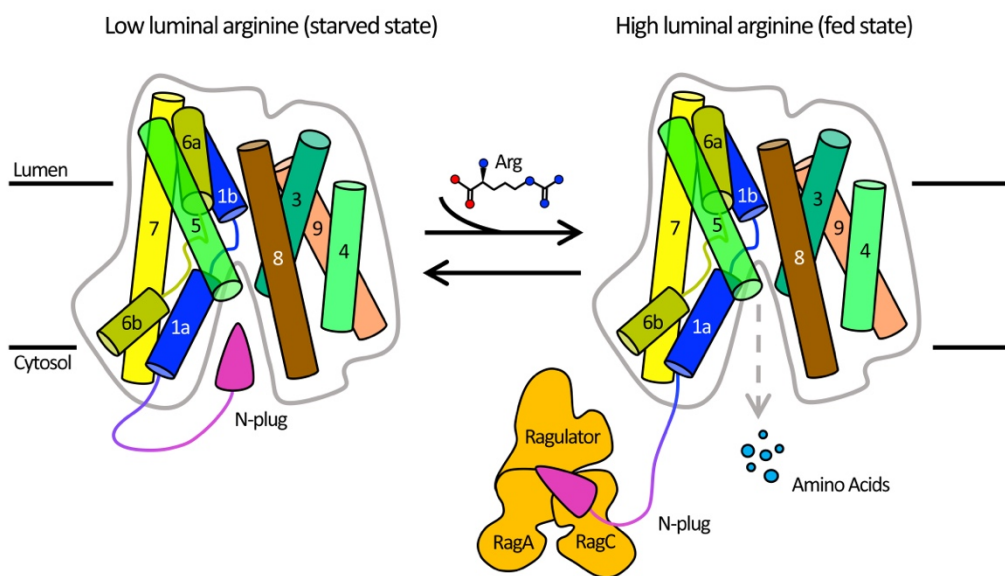

392

393

394

395

396

397

398

399

## 400 **Supplementary Materia**

401

### 402 **Materials and Methods:**

#### 403 **Protein expression and purification.**

404 The gene of wild-type SLC38A9 (NP\_001073468.1) from *Danio rerio* and its site-  
405 directed mutants were produced by polymerase chain reaction (PCR) and then sub-  
406 cloned into a pFastbac1 vector containing an octa-histidine tag with a thrombin-  
407 cleavage site at the N-terminus. drSLC38A9 protein and its variants were  
408 overexpressed in *Spodoptera frugiperda* Sf-9 insect cells following the protocol of  
409 Bac-to-Bac Baculovirus Expression System (Invitrogen). Cells were harvested at 60  
410 hours after infection and homogenized in the low salt buffer containing 20 mM Tris  
411 pH 8.0, 150 mM NaCl supplemented with cOmplete Protease Inhibitor Cocktail  
412 (Roche). The lysate was collected and ultra-centrifuged at 130,000 ×g for 1 hour.  
413 Pelleted membrane was then resuspended and washed with the high salt buffer  
414 containing 1.0 M NaCl and 20 mM Tris (8.0) followed by ultracentrifugation. The  
415 pellets were resuspended in the low salt buffer, frozen in liquid nitrogen and stored in  
416 -80°C until further use.

417

418 To purify drSLC38A9 protein and its variants, membrane fraction was thawed and  
419 solubilized with 2% n-dodecyl-b-D-maltopyranoside (DDM, Anatrace) in 20 mM Tris  
420 pH 8.0, 500 mM NaCl, 5% glycerol, and 0.2% Cholesteryl Hemisuccinate Tris Salt  
421 (CHS, Anatrace) for 4 hours at 4 °C. Following another ultra-centrifugation at  
422 130,000 ×g for 1 hour, the supernatant was loaded onto TALON Metal Affinity Resin  
423 (Clontech) and incubated at 4°C overnight. The resins were washed by 5× column  
424 volumes of 50 mM imidazole, 20 mM Tris pH 8, 500 mM NaCl, 0.1% DDM before  
425 equilibration in 20 mM Tris pH 8.0, 500 mM NaCl, 0.4% decyl-b-D-maltoside (DM)  
426 and 0.02% DDM. The N-terminal octa-histidine tag was removed by in-column  
427 thrombin digestion overnight at enzyme:protein molar ratio of 1:1000. The cleaved  
428 drSLC38A9 proteins collected in flow-through were then flash frozen in liquid  
429 nitrogen and stored in -80°C until use.

430

#### 431 **Fab fragments production**

432 Fab fragments were produced at Monoclonal Antibody Core of Vaccine and Gene  
433 Therapy Institute, OHSU. Mouse IgG monoclonal antibodies against drSLC38A9  
434 were raised by standard protocol (33) using purified protein in the buffer containing  
435 20 mM Tris pH 8.0, 150 mM NaCl, 0.02% DDM, 0.002% CHS as antigen. Western  
436 blot and native-to-denature ELISA assays (34) were performed to assess the binding



437 affinity and specificity of the antibodies generated from hybridoma cell lines. Several  
438 monoclonal antibodies showing high binding affinity and specificity to  
439 conformational epitope were then selected and purified from the hybridoma  
440 supernatants. Fab fragments were generated by Papain (Thermo Fisher Scientific)  
441 digestion and purified by Protein A affinity chromatography (GE Healthcare) in 20  
442 mM Sodium phosphates *pH* 8.0, 150 mM NaCl.

443

#### 444 **Purification of drSLC38A9-Fab complexes for crystallization.**

445 Purified drSLC38A9 proteins was mixed with excess Fab fragments at a molar ratio  
446 of 1:2 for 2 hour, and the mixture was subjected to gel filtration (Superdex 200  
447 Increase 10/300 GL, GE Healthcare) in the buffer containing 20 mM Tris-HCl *pH* 8.0,  
448 150 mM NaCl and 0.2% DM. The peak fractions containing appropriate drSLC38A9-  
449 Fab complexes were then pooled and concentrated to 5 mg/mL for crystallization.

450

#### 451 **Crystallization**

452 Crystallization was carried out by hanging-drop vapor diffusion at 4 °C. Initial hits of  
453 drSLC38A9 were identified in multiple conditions containing PEG 400. However,  
454 these crystals gave anisotropic diffraction to ~6 Å. Well diffracting crystals were only  
455 obtained when drSLC38A9 was co-crystallized as a complex with Fab fragment  
456 prepared from hybridoma cell line 11D3 (IgG2a, kappa) at 5 mg/mL mixed 1:1 with  
457 drop solution containing 30% PEG 400, 100 mM ADA *pH* 6.0 and 350 mM Li<sub>2</sub>SO<sub>4</sub>.

458

#### 459 **Data collection and structure determination.**

460 Before data collection, crystals were soaked in a cryoprotectant buffer containing 30%  
461 PEG 400 in the same crystallizing solution for 1 min, and rapidly frozen in liquid  
462 nitrogen. All diffraction data for drSLC38A9-Fab complex was collected at 100K  
463 using synchrotron radiation at the Advanced Photon Source (NE-CAT 24-ID-C and  
464 24-ID-E). Diffraction data indexing, integration and scaling were performed with  
465 online server RAPD and CCP4 suite package (35). Data collection statistics, phasing  
466 and refinement are given in Table S1. Molecular replacement using Phaser (36) was  
467 able to place two copies of Fab fragment (PDB ID: 1F8T) in native datasets. Helices  
468 of drSLC38A9 were manually placed in the density-modified map and extended  
469 within Coot (37) according to the reference model of ΔN-drSLC38A9-Fab complex  
470 (PDB ID: 6C08). Subsequent cycles of density modifications, model building and  
471 refinement were carried out in Phenix (38, 39) and Coot until structure completion  
472 (Fig. S2). The Ramachandran analyses of final structures were performed using  
473 Molprobity (40). The model has been deposited into the PDB (PDB ID: 6dci).



474

### 475 **Proteoliposomes reconstitution and radioligand uptake assays**

476 The full-length drSLC38A9 and two variants, N-terminal deletion (truncate N-  
477 terminus from Met 1 to Val 96) and 5A (P79A, S80A, H81A, E82A, and Y85A)  
478 mutant protein, were expressed and purified as described above. Liposomes were  
479 prepared using a 3:1 ratio of *E. coli* total lipid extract (Avanti Polar Lipids) to chicken  
480 egg phosphatidylcholine (egg-PC, Avanti Polar Lipids) at 20 mg/mL in assay buffer  
481 (20mM MES pH 5.0, 150mM NaCl and 1mM DTT). An extruder with pore size of  
482 0.4  $\mu\text{m}$  was used to obtain unilamellar vesicles. Triton X-100 was then added to the  
483 extruded liposomes at 10:1 (w:w) lipid:detergent ratio. Purified wild-type drSLC38A9  
484 and variants were reconstituted at a 1:200 (w/w) ratio in destabilized liposomes and  
485 excess detergent was removed by SM2 Bio-Beads (Bio-Rad) at 4 °C overnight. Next  
486 day, proteoliposomes were collected, aliquoted and frozen at -80°C for storage until  
487 needed.

488

489 Transport reactions were initiated by adding [<sup>3</sup>H]-labeled amino acids (American  
490 Radiolabeled Chemicals) to 50  $\mu\text{L}$  of 10-fold diluted proteoliposomes (total of 0.5  $\mu\text{g}$   
491 protein) to final concentration of 0.5  $\mu\text{M}$  at room temperature. As controls, non-  
492 specific uptake was assessed by using protein-free liposomes under identical  
493 conditions in parallel to experimental groups. At various time points, reactions were  
494 stopped by quenching the samples with 5 mL assay buffer followed by rapid filtration  
495 through 0.22 $\mu\text{m}$  membrane filter (GSWP02500, MilliporeSigma) to remove  
496 excess radioligands. The filter was then washed three times with 5 mL assay buffer,  
497 suspended in 10 mL of scintillation fluid and quantified by scintillation counting. A  
498 time course profile indicates that the retained radio-ligands reached saturation after 10  
499 min. Measurements at various time points of the uptake were plot to establish the  
500 transport comparisons between various constructs of drSLC38A9. All experiment and  
501 control groups were repeated two to three times.

502

### 503 **Co-Purification of zebrafish Rag GTPase complex with N-terminal fragment of** 504 **drSLC38A9**

505 The synthesized cDNA encoding RagA (UniProtKB - Q7ZUI2) and RagC  
506 (UniProtKB - F1Q665) from *Danio rerio* were cloned into pFastBac Dual vector. The  
507 Rag GTPase complex were overexpressed in *Spodoptera frugiperda* Sf-9 insect cells,  
508 which was harvested at 48 hours post-infection. Cell pellets were resuspended in lysis  
509 buffer containing 20 mM Tris pH 8.0, 150 mM NaCl. 30 homogenizing cycles were  
510 then carried out to break cells on ice, followed by a centrifugation at 130,000  $\times g$  for

511 30 mins. The supernatant was incubated with Ni-NTA Agarose (QIGEN) for 2 hours  
512 at 4°C. The resins were then washed with 5× column volumes of wash buffer  
513 containing 50mM Imidazole, 20 mM Tris pH 8.0, 150 mM NaCl. The protein was  
514 eluted by elution buffer containing 300 mM imidazole, 20 mM Tris pH 8.0, 150 mM  
515 NaCl, and then applied to gel filtration (Superdex 200 Increase 10/300 GL, GE  
516 Healthcare) in 20 mM Tris pH 8.0, 150 mM NaCl. The peak fractions were collected  
517 for further analysis.

518

519 To enhance solubility and stability, the N-terminal fragments of drSLC38A9 were  
520 fused with GB1 domain-tag (41). drSLC38A9-N.1 is from Met 1 to Val 96, and  
521 drSLC38A9-N.2 is from Met 1 to Leu 70. The fusion proteins were overexpressed in  
522 *E. coli* BL21 (DE3) at 16°C for overnight with 0.2 mM isopropyl-β-D-  
523 thiogalactopyranoside (IPTG) as inducer. Then, the cells were harvested,  
524 homogenized in a lysis buffer containing 20mM Tris pH 8.0 and 150mM NaCl, and  
525 disrupted using a Microfluidizer (Microfluidics Corporation) with 3 passes at 15,000  
526 p.s.i., followed by a centrifugation for 30 mins to remove cell debris. The supernatant  
527 was then loaded onto Ni-NTA Agarose and purified as above.

528

529 The purified Rag GTPase complex was mixed with excess GB1-drSLC38A9-N.x  
530 fragment at a molar ration of 1:2 for 1 hour, and the mixture was then subjected to gel  
531 filtration (Superdex 200 Increase 10/300 GL, GE Healthcare) in the buffer containing  
532 20 mM Tris pH 8.0, 150 mM NaCl. SDS-PAGE and Coomassie blue staining was  
533 used to analyze the size exclusion chromatography elution profile.

534

535 All figures in this paper were prepared with PyMOL v1.8.6.0 (42). Figure. S3 was  
536 prepared using the program Clustal Omega (43) for alignments and ESPript 3.0 (44)  
537 for styling.

538

539

540

541

542

543

544

545

546

547 **Table S1:**

548 **Table S1 Data collection and refinement statistics**

| S38A9-Fab <sup>†</sup>                              |                                     |
|-----------------------------------------------------|-------------------------------------|
| <b>Data collection</b>                              |                                     |
| Space group                                         | P 1 21 1                            |
| Cell dimensions                                     |                                     |
| <i>a, b, c</i> (Å)                                  | 157.79, 82.51, 158.59               |
| $\alpha, \beta, \gamma$ (°)                         | 90.00, 106.02, 90.00                |
| Resolution (Å)                                      | 49.37-3.40 (3.50-3.40) <sup>‡</sup> |
| R <sub>pim</sub> <sup>¶</sup>                       | 0.084 (1.071)                       |
| Mean <i>I</i> / $\sigma(I)$                         | 6.5 (1.0)                           |
| Completeness (%)                                    | 99.9 (99.8)                         |
| Redundancy                                          | 11.8 (6.1)                          |
| CC <sub>1/2</sub>                                   | 0.989 (0.350)                       |
| <b>Refinement</b>                                   |                                     |
| Resolution (Å)                                      | 49.37-3.40 (3.50-3.40)              |
| No. of reflections                                  | 54395 (5350)                        |
| <i>R</i> <sub>work</sub> / <i>R</i> <sub>free</sub> | 0.266/0.290<br>(0.352/0.368)        |
| No. of non-hydrogen atoms                           |                                     |
| Protein                                             | 12579                               |
| Average <i>B</i> -factors                           |                                     |
| Protein                                             | 106.96                              |
| R.m.s. deviations                                   |                                     |
| Bond lengths (Å)                                    | 0.007                               |
| Bond angles (°)                                     | 1.33                                |
| Ramachandran                                        |                                     |
| favored (%)                                         | 91.65                               |
| outliers (%)                                        | 1.38                                |

549 <sup>†</sup> Four crystals were used to collect diffraction datasets which were processed, scaled,  
550 and merged using RAPD and AIMLESS.

551 <sup>‡</sup> Values in parentheses are for highest-resolution shell.

552 <sup>¶</sup> R<sub>pim</sub> is a measure of the quality of the data after averaging the multiple  
553 measurements and  $R_{pim} = \frac{\sum_{hkl} [n/(n-1)]^{1/2} \sum_i |I_i(hkl) - \langle I(hkl) \rangle|}{\sum_{hkl} \sum_i I_i(hkl)}$ , where *n*  
554 is the multiplicity, *I<sub>i</sub>* is the intensity of the *i*<sup>th</sup> observation,  $\langle I \rangle$  is the mean intensity  
555 of the reflection and the summations extend over all unique reflections (hkl) and all  
556 equivalents (i), respectively. (45)

557

558 **Fig. S1 - S6:**

Fig. S1

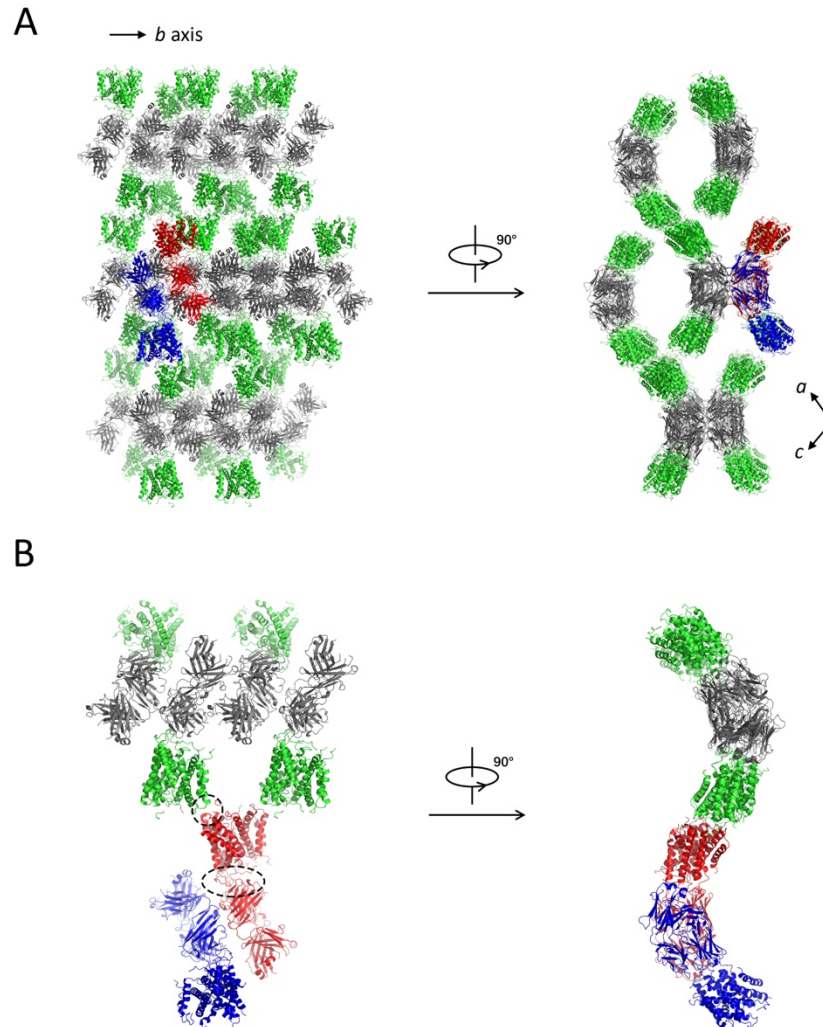

559

560 **Fig. S1. Crystal packing and asymmetric unit.** (A) Crystal packing showing  
561 SLC38A9-Fab complex lattice. Fab fragments (grey) form continuous layers in the  
562 crystallographic *b* axis, which are connected by SLC38A9 (green) layers along the  
563 crystallographic *ac* plane in a propeller-like head-to-head manner. One asymmetric  
564 unit is selected to show the structural block comprising two-fold SLC38A-Fab  
565 molecules (red and blue). (B) Interactions between SLC38A9 molecules and Fab  
566 fragments. One SLC38A9 (red) makes biological contacts with the complementary  
567 determining regions (CDRs) of a Fab (red) by its luminal loops. It also has  
568 interactions between Loop 8-9 (red) and Loop 10-11 (green), which appear to be  
569 crystal contacts and non-specific.

570

Fig. S2

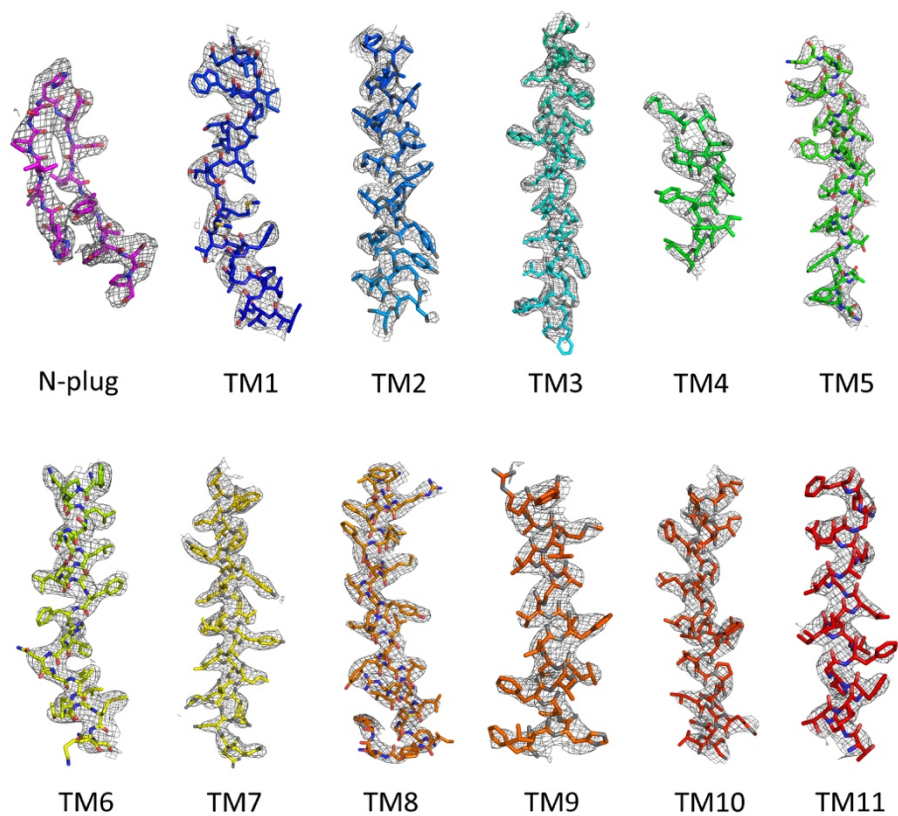

571

572 **Fig. S2. Overall experimental density of N-plug and membrane helices of**

573 **drSCL38A9 are shown with 2Fo-Fc map contoured at 1.2  $\sigma$  (gray mesh).**

574



Fig. S3

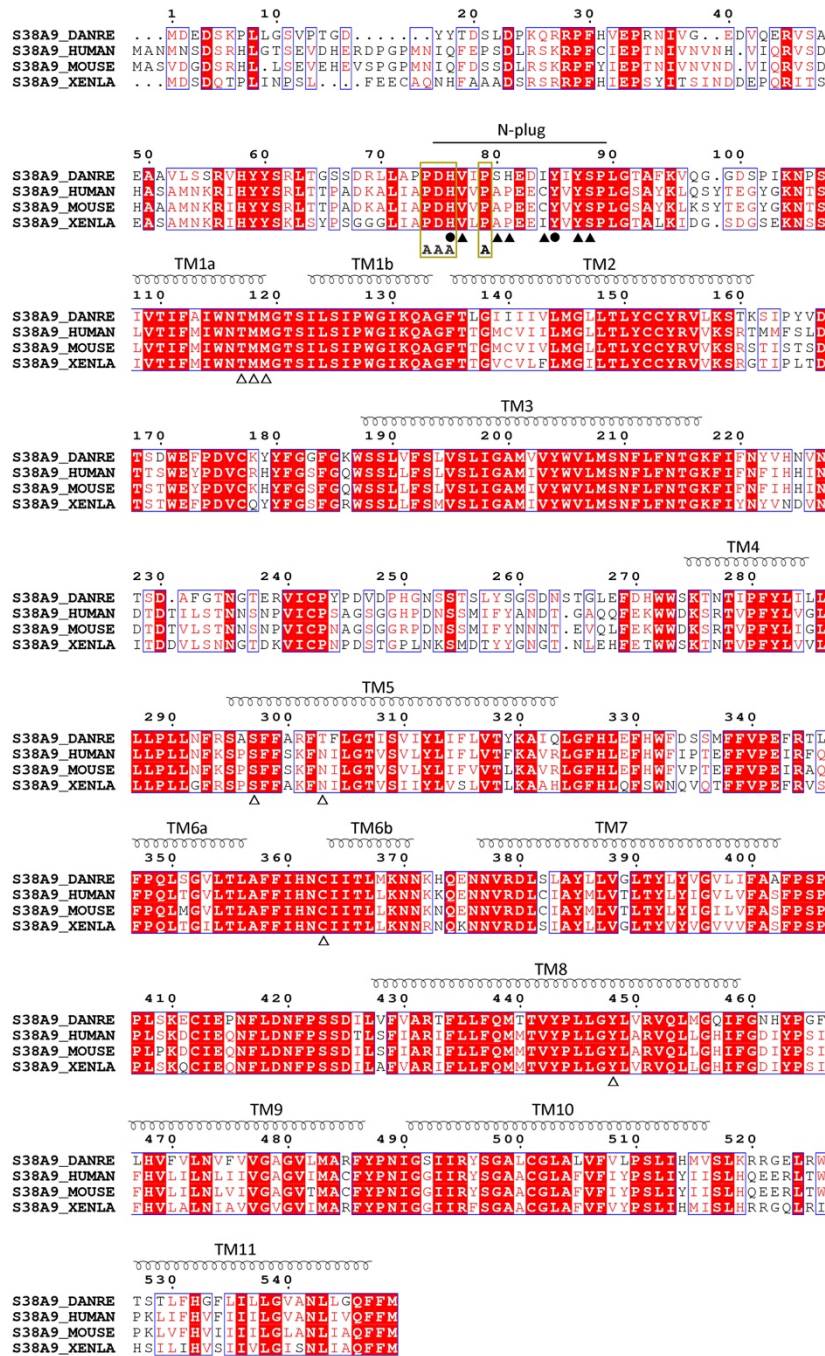

575

576 **Fig. S3. Sequence alignment of SLC38A9 from zebrafish, human, mouse and**  
 577 **clawed frog.** The N-plug of drSLC38A9 (from Asp 75 to Pro 89) is noted. Residues  
 578 which have hydrogen bonds between the N-plug and transmembrane helices were  
 579 labeled by triangles, while residues forming intra-interactions of N-plug were marked  
 580 with circles. Alanine substitutions of residues in yellow box will abolish the binding  
 581 of hSLC38A9 to downstream Rag GTPase complex.

582



Fig. S4

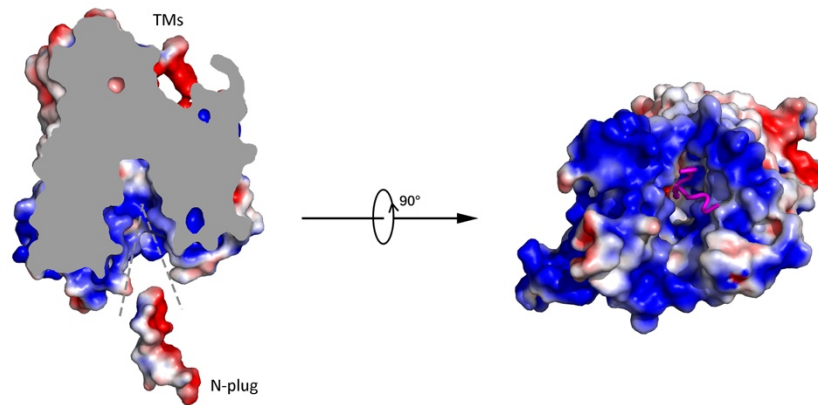

583

584 **Fig. S4. Electrostatic surface representation for drSLC38A9 showing the**  
585 **negatively charged N-plug blocks the access leading to cytosolic side, which is**  
586 **dominantly positively charged.**

587

Fig. S5

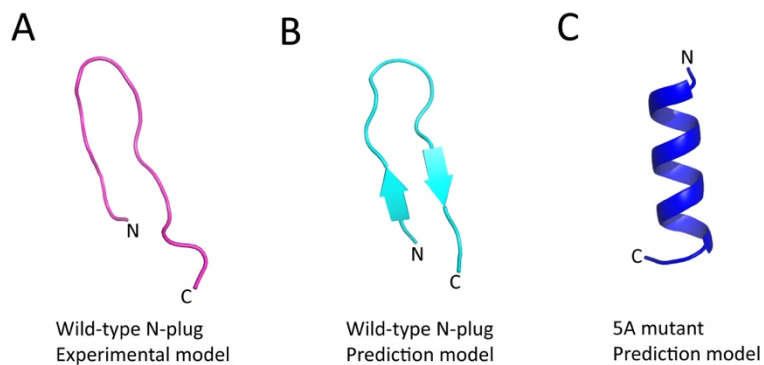

588

589 **Fig. S5. The 5A mutations (P79A, S80A, H81A, E82A, and Y85A) of N-plug**  
590 **disrupt its secondary structure. P79A, S80A, H81A, and E82A locate in the beta-**  
591 **turn motif. Y85A breaks hydrogen bonds of the beta-sheet network. (A) The**  
592 **experimental model of N-plug in current study. (C and D) The models of wild-type**  
593 **N-plug and 5A mutant peptide predicted by the same online server PEP-FOLD 2.0. (1)**

594

Fig. S6

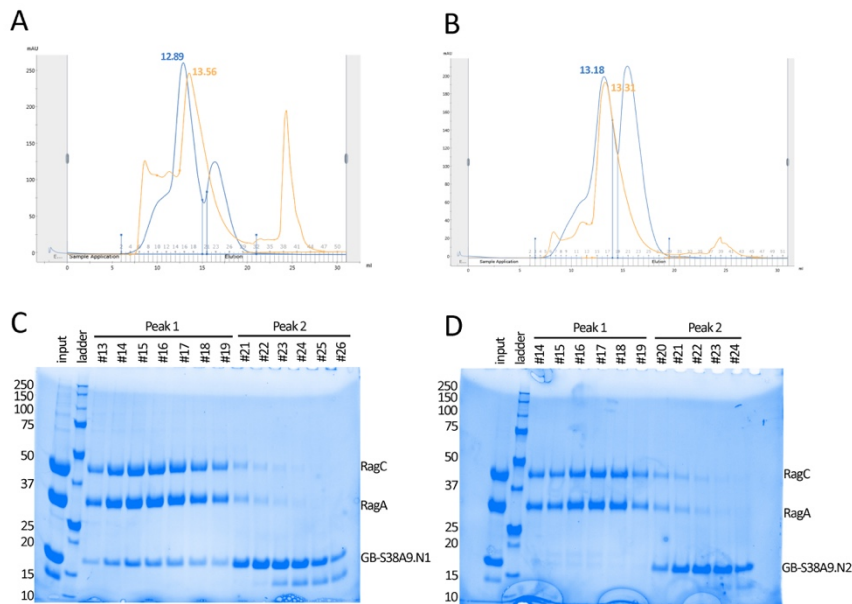

595

596 **Fig. S6. Co-purification of GB1 domain tagged N-terminal fragments of**  
597 **drSLC38A9 with zebrafish Rag GTPase complex.** (A) The chromatogram displays  
598 a blue line with one peak at 12.89 mL retention volume (fractions 13-19)  
599 corresponding to drSLC38A9.N1 (1-96) and Rag GTPase complex and a second peak  
600 (fractions 21-26) corresponding to unbound N-terminal fragments. The orange  
601 superimposed curve depicts the zebrafish Rag GTPase complex eluted in the same  
602 column. Apparent peak shift was observed for the formation of drSLC38A9.N1 (1-96)  
603 and Rag GTPase complex. (B) Size exclusion chromatography profile of  
604 drSLC38A9.N1 (1-70) and Rag GTPase. No conspicuous peak shift was observed. (C  
605 and D) Fractions selected in (A) and (B) was sampled and analyzed on SDS-PAGE,  
606 including the input controls.

607

608 **References and Notes:**

- 609 1. Y. Shen, J. Maupetit, P. Derreumaux, P. Tufféry, Improved PEP-FOLD  
610 Approach for Peptide and Miniprotein Structure Prediction. *J. Chem. Theory*  
611 *Comput.* **10**, 4745–4758 (2014).

612
